# Supplementary material for: Supramolecular self-assembly of tin(iv) porphyrin channels stabilizing single-file chains of water molecules
Source: Royal Society of Chemistry journal article supplement (doi:10.1039/b504841a), 2005-01-01
Supplement: b504841a.pdf [file b504841a.pdf]

# Supplementary Information

for

## Supramolecular self-assembly of tin(IV) porphyrin channels stabilizing single-file chains of water molecules

Hee-Joon Kim,<sup>\*a</sup> Hwa Jin Jo,<sup>a</sup> Jaheon Kim,<sup>b</sup> Soo-Young Kim,<sup>c</sup> Dongwoo Kim,<sup>c</sup> and Kimoon Kim<sup>c</sup>

<sup>a</sup>*Department of Applied Chemistry, Kumoh National Institute of Technology, 1 Yangho-dong, Gumi 730-701, Republic of Korea. E-mail: hjk@kumoh.ac.kr*

<sup>b</sup>*Department of Chemistry and CAMDRC, Soongsil University, Seoul 156-743, Republic of Korea*

<sup>c</sup>*National Creative Research Initiative Center for Smart Supramolecules and Department of Chemistry, Division of Molecular and Life Sciences, Pohang University of Science and Technology, Pohang 790-784, Republic of Korea*

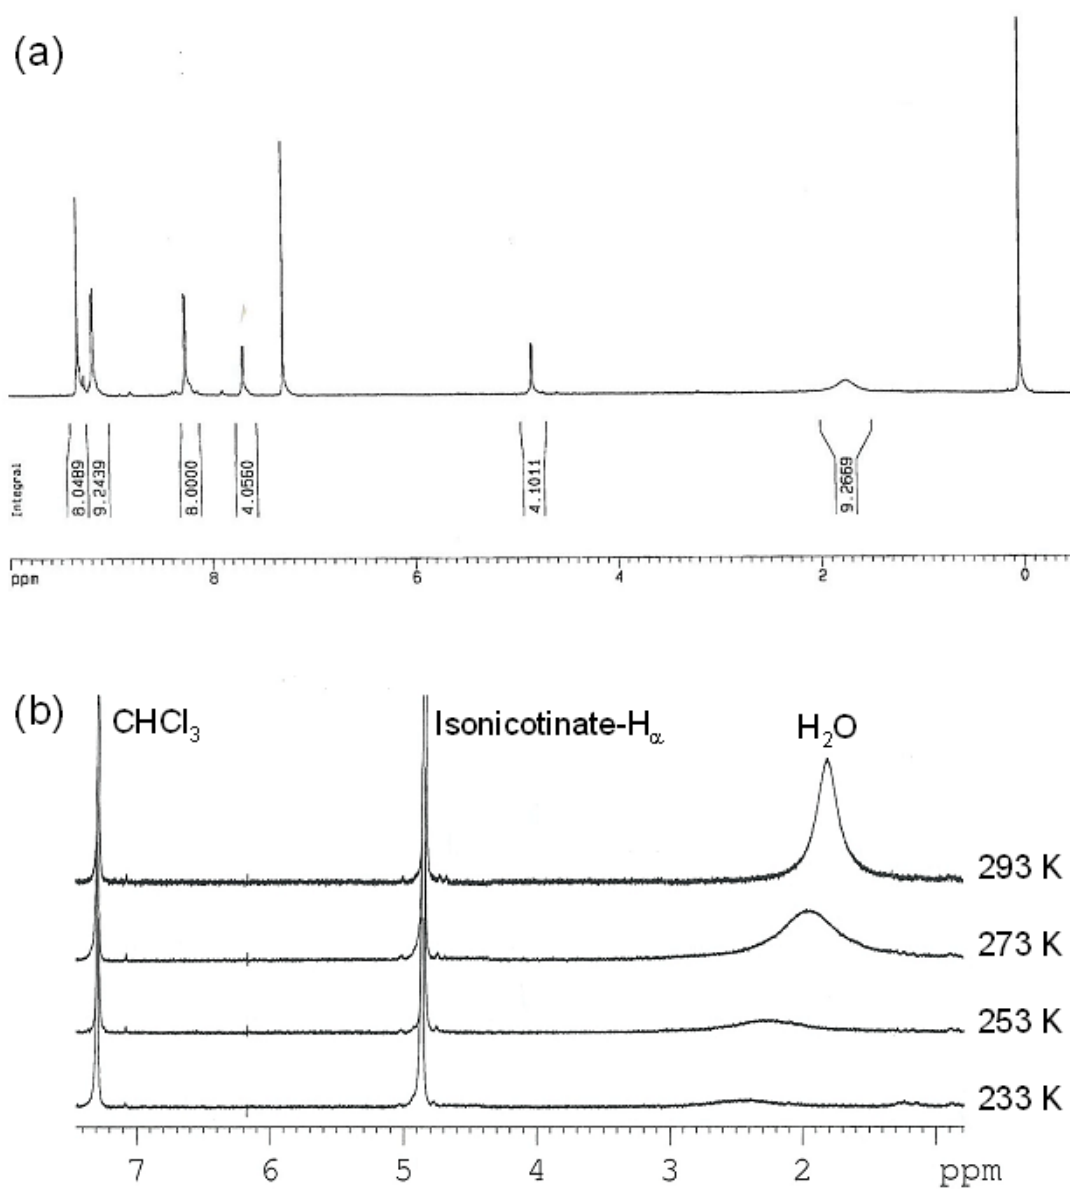

**Fig. S1** (a)  $^1\text{H}$  NMR spectrum of **1** in  $\text{CDCl}_3$  (500 MHz) at 298K, (b) stacked plot showing water resonance of  $^1\text{H}$  NMR spectra of **1** in  $\text{CDCl}_3$  determined at a range of temperatures from 293 K to 233K.

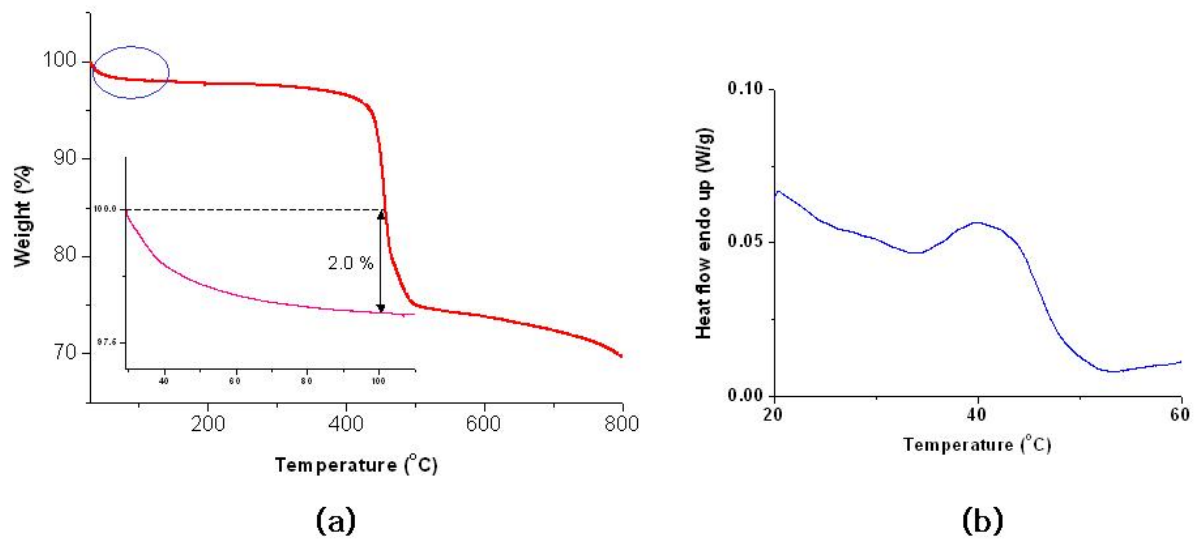

Fig. S2 Diagrams for (a) TGA and (b) DSC of  $1 \cdot 2\text{H}_2\text{O}$ .

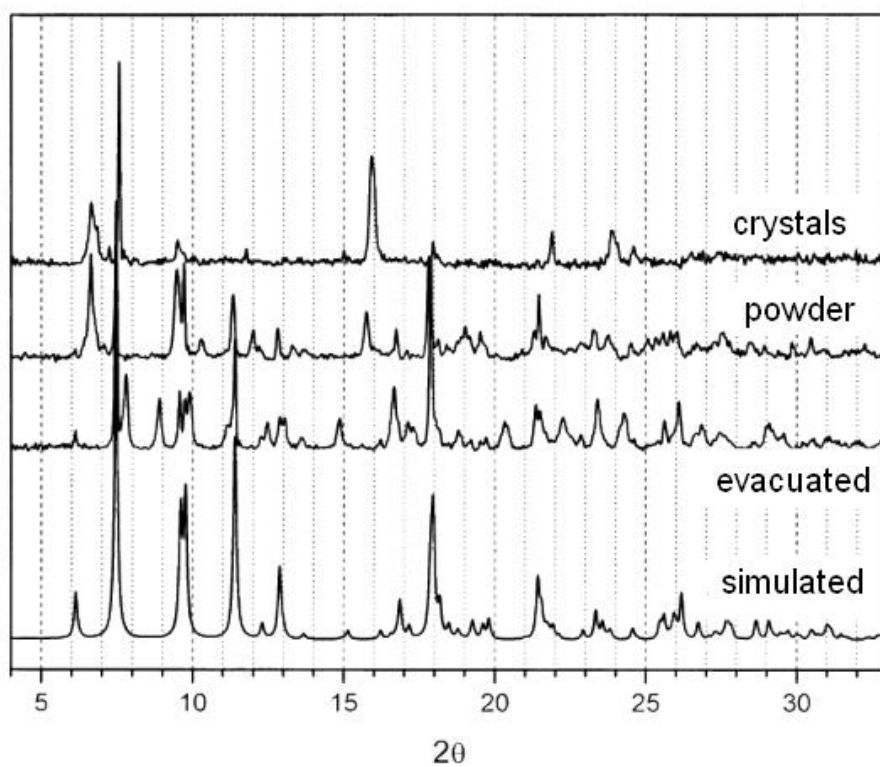

Fig. S3 Powder X-ray diffraction patterns of  $1 \cdot 2\text{H}_2\text{O}$ .
